# Supplementary material for: Employing bulk-heterostructure conductive polymer PFO/PFBT for the photoelectrochemical analysis of p-phenylenediamine
Source: Royal Society of Chemistry journal article supplement (doi:10.1039/d3an00872j), 2023-01-01
Supplement: d3an00872j1.pdf [file d3an00872j1.pdf]

# **Employing bulk-heterostructure conductive polymer PFBT/PFO for Photoelectrochemical Analysis of *p*-phenylenediamine**

Kangdi Guan, Ziwei Zhang, Pinghua Ling,\* and Feng Gao\*

Laboratory of Functionalized Molecular Solids, Ministry of Education, Anhui Key Laboratory of Chemo/Biosensing, Laboratory of Biosensing and Bioimaging (LOBAB), College of Chemistry and Materials Science, Anhui Normal University, Wuhu 241002, P. R. China

\*Corresponding author. Phone/Fax: +86-553-3937137. E-mail: phling@ahnu.edu.cn;  
fgao@mail.ahnu.edu.cn.

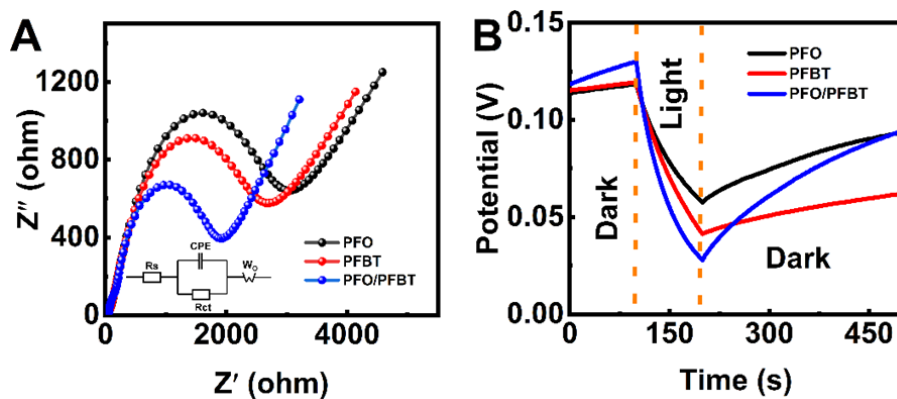

Fig. S1. (A) EIS and (B) OCP spectra of PFO/ITO, PFBT/ITO, and PFO/PFBT/ITO electrodes.

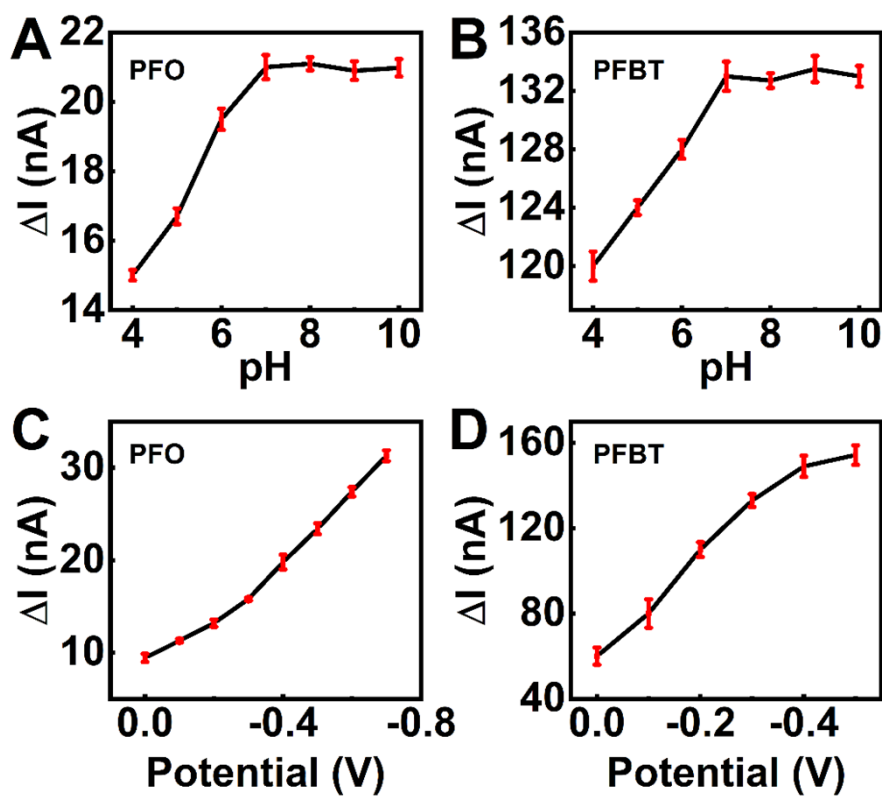

Fig. S2. Effects of solution pH on (A) PFO/ITO and (B) PFBT/ITO electrode electrochemical response, and external potential on (C) PFO/ITO and (D) PFBT/ITO electrode electrochemical response in the presence of 20  $\mu\text{M}$  p-PD.

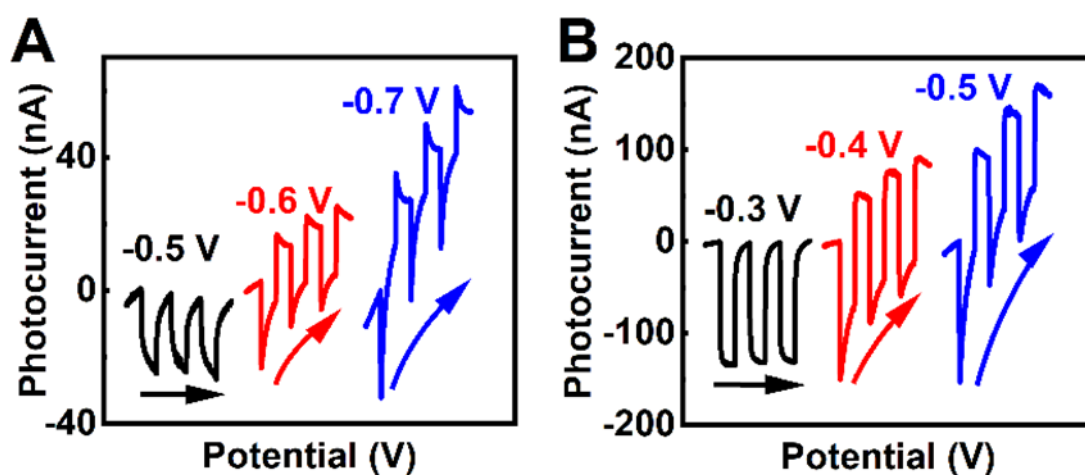

Fig. S3. The amperometric response was recorded for (A) PFO/ITO and (B) PFBT/ITO at different potential in the presence of 20 mM p-pd.

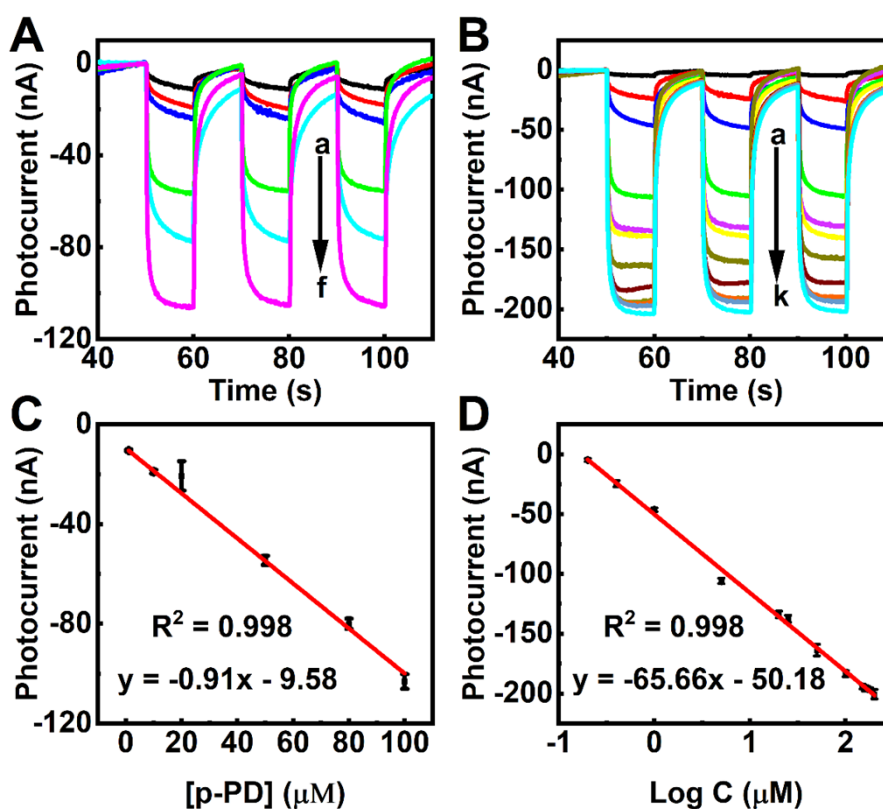

Fig. S4. (A) Photocurrent responses of the PFO/ITO electrode to 1, 10, 20, 50, 80, 100  $\mu\text{M}$  (from a to f). (B) Photocurrent responses of the PFBT/ITO electrode to 0.2, 0.4, 1, 5, 20, 50, 100, 150, 160, 180, 200  $\mu\text{M}$  (from a to k). (C) Plot of peak current vs p-pd concentration on PFO/ITO electrode, and (D) Plot of peak current vs logarithm of p-pd concentration on PFO/PFBT/ITO electrode.

Table S1. The analytical performance of PFO/ITO, PFBT/ITO and PFO/PFBT/ITO electrode toward p-pd.

| Electrode | Regression equation          | correlation coefficient | detection limit ( $\mu\text{M}$ ) |
|-----------|------------------------------|-------------------------|-----------------------------------|
| PFO       | $\Delta I = -0.91x - 9.58$   | 0.998                   | 0.47                              |
| PFBT      | $\Delta I = -65.66x - 50.18$ | 0.998                   | 0.16                              |
| PFO/PFBT  | $\Delta I = -79.37x - 78.43$ | 0.993                   | 0.096                             |

Table S2. Comparison on the analytical performance toward p--PD between the present protocol and previously reported sensors.

| Range of detection ( $\mu\text{M}$ ) | Limit of detection ( $\mu\text{M}$ ) | Method               | Reference |
|--------------------------------------|--------------------------------------|----------------------|-----------|
| 30-400                               | 30                                   | Fluorescence         | 1         |
| 0.1-10                               | 0.056                                | Fluorescence         | 2         |
| 0.1-3                                | 0.043                                | Photoelectrochemical | 3         |
| 0.02-10                              | 0.007                                | Fluorescence         | 4         |
| 0.1-200                              | 0.096                                | Photoelectrochemical | This work |

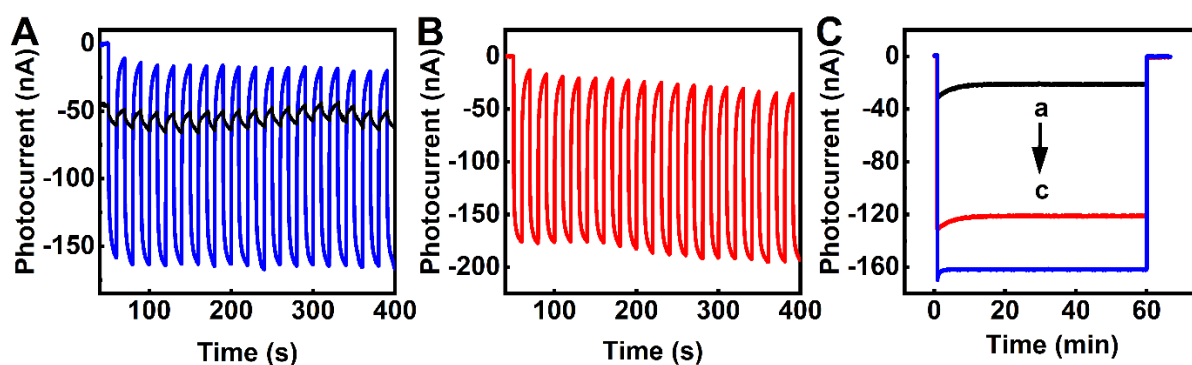

Fig. S5. Amperometric response of (A) PFO/ITO electrode (black) and PFBT/ITO electrode (blue), and (B) PFO/PFBT/ITO electrodes in the presence of 20  $\mu\text{M}$  p-pd in 0.1 M PBS. (C) I-t plots recorded at -0.3 V for PFO/ITO electrode (a), PFBT/ITO electrode (b), and PFO/PFBT/ITO electrodes (c) in the presence of 20  $\mu\text{M}$  p-pd in 0.1 M PBS.

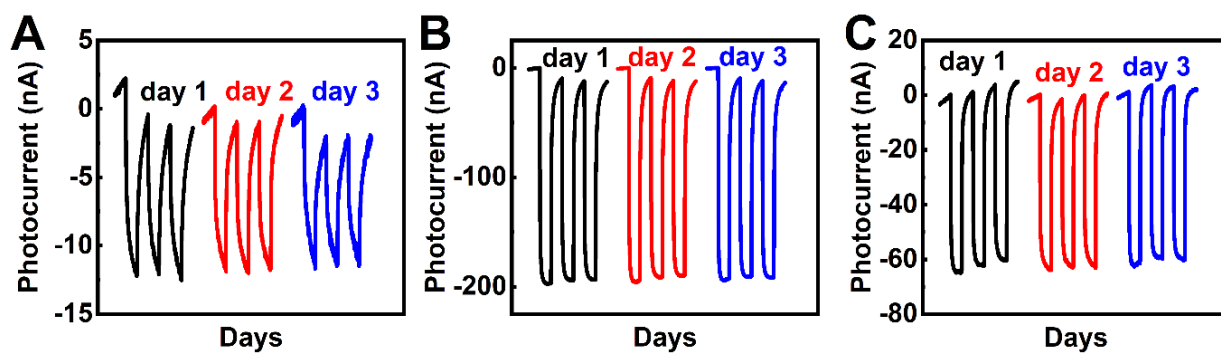

Fig. S6. The amperometric response was recorded for (A) PFO/ITO electrode, (B) PFBT/ITO electrode and (C) PFO/PFBT/ITO electrode at -0.3 V in the presence of 20  $\mu\text{M}$  p-pd in 0.1 M PBS with different time.

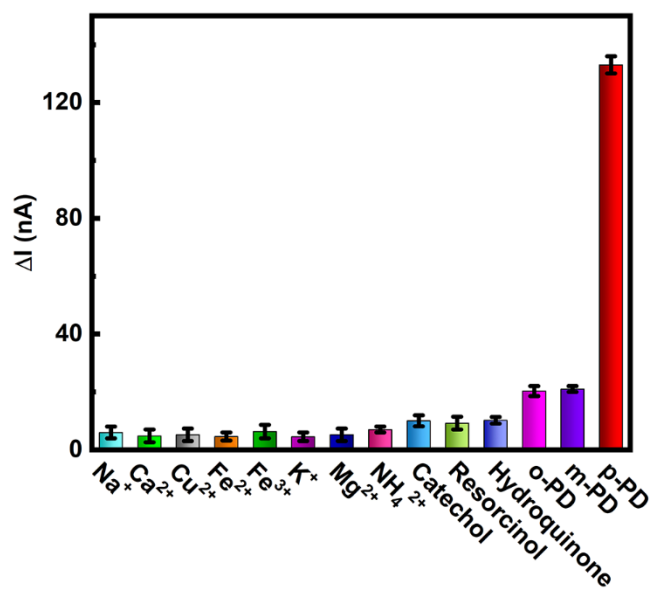

Fig. S7. Photocurrent response ( $\Delta I$ ) of PFO/PFBT/ITO electrode toward 10  $\mu\text{M}$  p-PD and 1 mM interfering species.

**Table S3** PEC sensing of p-PD in hair dye creams.

| Sample        | Blank ( $\mu\text{M}$ ) | Addition ( $\mu\text{M}$ ) | Actuality ( $\mu\text{M}$ ) | Recovery | Average recovery | RSD     |
|---------------|-------------------------|----------------------------|-----------------------------|----------|------------------|---------|
| S1<br>(0.05g) | 0.156                   | 0.2                        | 0.377                       | 105.90%  | 108.99%          | 3.85%   |
|               |                         |                            | 0.382                       | 107.30%  |                  |         |
|               |                         |                            | 0.405                       | 113.76%  |                  |         |
|               | 0.172                   | 0.5                        | 0.714                       | 106.25%  | 99.16%           | 8.57%   |
|               |                         |                            | 0.603                       | 89.73%   |                  |         |
|               |                         |                            | 0.682                       | 101.49%  |                  |         |
|               | 0.169                   | 1                          | 1.283                       | 109.75%  | 104.42%          | 4.51%   |
|               |                         |                            | 1.179                       | 100.86%  |                  |         |
|               |                         |                            | 1.200                       | 102.65%  |                  |         |
|               | S2<br>(0.1g)            | 0.335                      | 0.2                         | 0.548    | 102.43%          | 100.69% |
| 0.527         |                         |                            |                             | 98.50%   |                  |         |
| 0.541         |                         |                            |                             | 101.12%  |                  |         |
| 0.327         |                         | 0.5                        | 0.793                       | 95.89%   | 99.92%           | 5.13%   |
|               |                         |                            | 0.812                       | 98.19%   |                  |         |
|               |                         |                            | 0.874                       | 105.68%  |                  |         |
| 0.367         |                         | 1                          | 1.402                       | 102.56%  | 102.90%          | 1.17%   |
|               |                         |                            | 1.425                       | 104.24%  |                  |         |
|               |                         |                            | 1.393                       | 101.90%  |                  |         |
| S3<br>(0.5g)  |                         | 1.637                      | 0.2                         | 1.859    | 101.20%          | 101.60% |
|               | 1.823                   |                            |                             | 99.24%   |                  |         |
|               | 1.917                   |                            |                             | 104.35%  |                  |         |
|               | 1.835                   | 0.5                        | 2.318                       | 99.27%   | 100.09%          | 1.83%   |
|               |                         |                            | 2.307                       | 98.80%   |                  |         |
|               |                         |                            | 2.386                       | 102.18%  |                  |         |
|               | 1.727                   | 1                          | 2.808                       | 102.97%  | 99.84%           | 3.56%   |
|               |                         |                            | 2.655                       | 97.36%   |                  |         |
|               |                         |                            | 2.631                       | 96.48%   |                  |         |

**Table S4** PEC sensing of p-PD in dye wastewater.

| Sample        | Blank ( $\mu\text{M}$ ) | Addition ( $\mu\text{M}$ ) | Actuality ( $\mu\text{M}$ ) | Recovery | Average recovery | RSD    |       |
|---------------|-------------------------|----------------------------|-----------------------------|----------|------------------|--------|-------|
| S1<br>(0.05g) | 0.247                   | 1                          | 1.235                       | 99.04%   | 102.97%          | 3.36%  |       |
|               |                         |                            | 1.301                       | 104.33%  |                  |        |       |
|               |                         |                            | 1.316                       | 105.53%  |                  |        |       |
|               | 0.266                   | 5                          | 5.172                       | 98.21%   | 99.78%           | 1.43%  |       |
|               |                         |                            | 5.318                       | 100.99%  |                  |        |       |
|               |                         |                            | 5.274                       | 100.15%  |                  |        |       |
|               | 0.295                   | 10                         | 10.406                      | 101.08%  | 97.25%           | 3.48%  |       |
|               |                         |                            | 9.883                       | 96.00%   |                  |        |       |
|               |                         |                            | 9.747                       | 94.68%   |                  |        |       |
|               | S2<br>(0.1g)            | 0.575                      | 1                           | 1.493    | 94.79%           | 98.41% | 4.56% |
|               |                         |                            |                             | 1.528    | 97.02%           |        |       |
|               |                         |                            |                             | 1.629    | 103.43%          |        |       |
| 0.612         |                         | 5                          | 5.668                       | 101.00%  | 103.35%          | 2.78%  |       |
|               |                         |                            | 5.752                       | 102.49%  |                  |        |       |
|               |                         |                            | 5.980                       | 106.56%  |                  |        |       |
| 0.625         | 10                      | 10.379                     | 97.68%                      | 102.25%  | 6.94%            |        |       |
|               |                         | 10.481                     | 98.64%                      |          |                  |        |       |
|               |                         | 11.732                     | 110.42%                     |          |                  |        |       |
| S3<br>(0.5g)  | 2.688                   | 1                          | 3.790                       | 102.77%  | 107.34%          | 4.29%  |       |
|               |                         |                            | 3.914                       | 106.13%  |                  |        |       |
|               |                         |                            | 4.172                       | 113.12%  |                  |        |       |
|               | 2.493                   | 5                          | 7.911                       | 105.58%  | 106.34%          | 7.84%  |       |
|               |                         |                            | 7.374                       | 98.41%   |                  |        |       |
|               |                         |                            | 8.619                       | 115.03%  |                  |        |       |
| 2.741         | 10                      | 12.633                     | 99.15%                      | 94.43%   | 4.47%            |        |       |
|               |                         | 11.596                     | 91.01%                      |          |                  |        |       |
|               |                         | 11.865                     | 93.12%                      |          |                  |        |       |

## Reference

1. K. Ngamdee, S. Martwiset, T. Tuntulani and W. Ngeontae, *Sens. Actuators B Chem.*, 2012, **173**, 682-691.
2. W.J. Wang, J.M. Xia, X. Hai, M.L. Chen and J.H. Wang, *Environ Sci-nano.*, 2017, **4**, 1037-1044.
3. Y. Zhu, K. Yan, Y. Liu and J. Zhang. *Anal Chim. Acta.*, 2015, 884, 29-36.
4. L.F. Gao, X. Lin, X. Hai, X. W. Chen, and J.H. Wang. *ACS Appl Mater Inter.*, 2018, **10**, 43049-43056.
